# Supplementary material for: Covalently bonded graphene oxide–carbon nanotube hybrid nanofillers for achieving high-performance polyamide 6 composites with superior mechanical properties and thermal conductivity
Source: Royal Society of Chemistry journal article supplement (doi:10.1039/d5nr02405f), 2025-01-01
Supplement: d5nr02405f1.pdf [file d5nr02405f1.pdf]

## Supplementary Information

Covalently bonded graphene oxide-carbon nanotube hybrid nanofillers  
for achieving high-performance polyamide 6 composites with superior  
mechanical properties and thermal conductivity

Guanjun Liu<sup>a,\*</sup>, Yan Liu<sup>a</sup>, Meng Zhang<sup>a</sup>, Danyang Zhao<sup>a</sup>, Ping Liu<sup>a</sup>, Lu Wang<sup>b</sup>, Lizhi Li<sup>c</sup>,  
Meiling Yan<sup>d,\*</sup>

<sup>a</sup> *College of chemical engineering and materials, Shandong University of Aeronautics, Binzhou,  
256600, P. R. China*

<sup>b</sup> *Department of Geology and Surveying and Mapping, Shanxi Institute of Energy, Jinzhong,  
030600, P.R. China*

<sup>c</sup> *Zhengzhou Research Institute of Harbin Institute of Technology, Zhengzhou, 450001, P.R.  
China*

<sup>d</sup> *School of Materials Science and Engineering, Nanchang Hangkong University, Nanchang,  
330063, P.R. China*

---

\* Corresponding authors:

liuguanjun@sdua.edu.cn(Guanjun Liu); yanmeiling123@163.com(Meiling Yan)

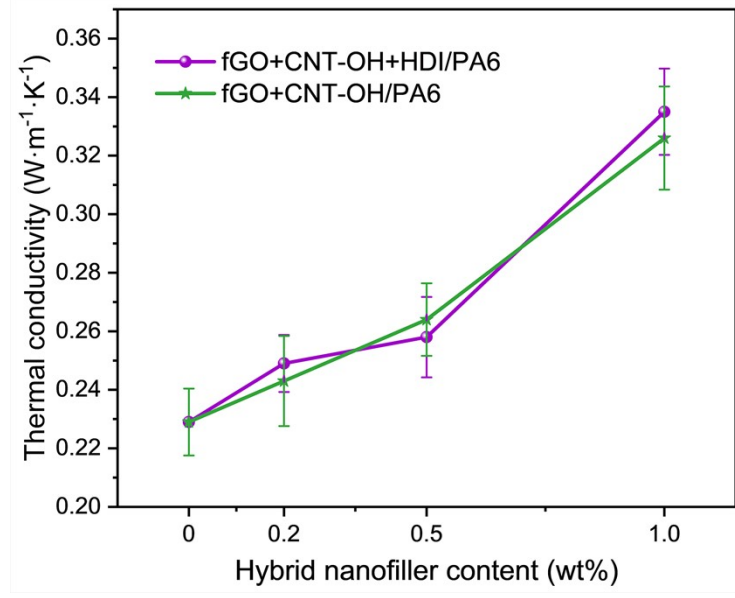

Figure S1 Comparative study on the thermal conductivity of fGO+CNT-OH/PA6 composites versus fGO+CNT-OH+HDI/PA6 composites.
